# Supplementary material for: Ligustilide, a major bioactive component of Angelica sinensis, promotes bone formation via the GPR30/EGFR pathway
Source: PubMed Central journal article supplement (PMC6502875; doi:10.1038/s41598-019-43518-7), 2019-05-06

## Supplementary Information

### **Ligustilide, a major bioactive component of *Angelica sinensis*, promotes bone formation via the GPR30/EGFR pathway**

Yang F<sup>1,3</sup>, Lin ZW<sup>1,3</sup>, Huang TY<sup>1,3</sup>, Chen TT<sup>1,3</sup>, Cui J<sup>1,3</sup>, Li MY<sup>1,3</sup>, Hua YQ<sup>1,2,3\*</sup>

<sup>1</sup> Jiangsu Key Laboratory for Pharmacology and Safety Evaluation of Chinese Materia Medica, School of Pharmacy, Nanjing University of Chinese Medicine, Nanjing 210023, China

<sup>2</sup> Jiangsu Collaborative Innovation Center of Chinese Medicinal Resources Industrialization, Nanjing University of Chinese Medicine, Nanjing 210023, China

<sup>3</sup> School of Pharmacy, Nanjing University of Chinese Medicine, Nanjing 210023, Jiangsu Province, China.

\*Corresponding author at: School of Pharmacy, Nanjing University of Chinese Medicine, 138 Xianlin Avenue, Qixia District, Nanjing 210023, Jiangsu Province, China.

Tel.: +86 25 85811531

E-mail address: hua\_yq@njucm.edu.cn.

Fig S1.

a

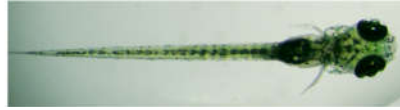

b

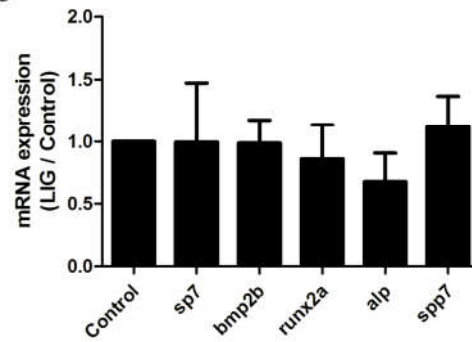

Fig S1. Effects of ligustilide on bone formation in zebrafish. (a) Bright field image of zebrafish at 9 dpf. (b) The mRNA expression of spp1, alp, runx2a, sp7, and bmp2b measured by quantitative RT-PCR in zebrafish at 9 dpf. Error bars indicate S.E.M. (n = 3).

Fig 3.

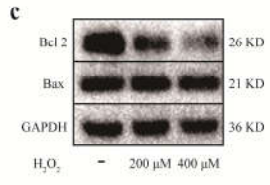

Original films

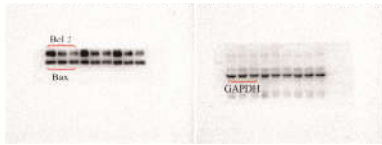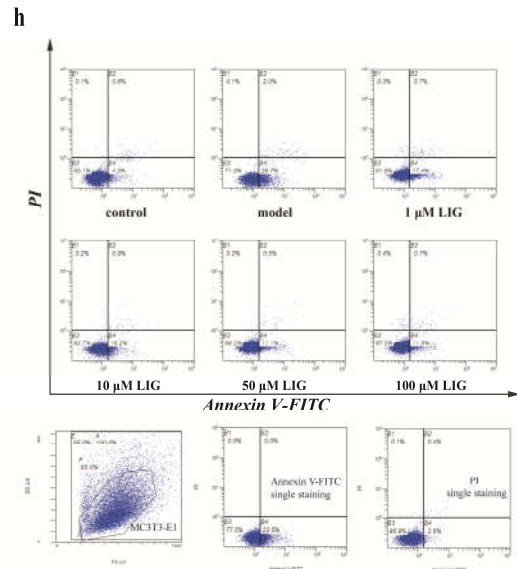

Fig 4.

b

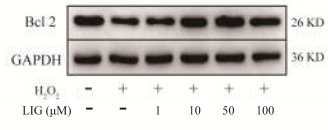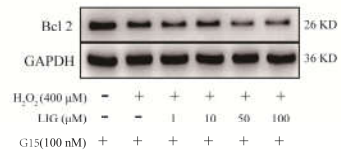

Original films

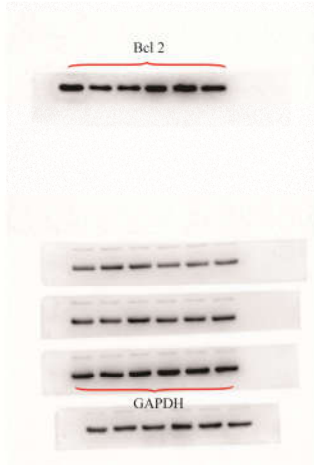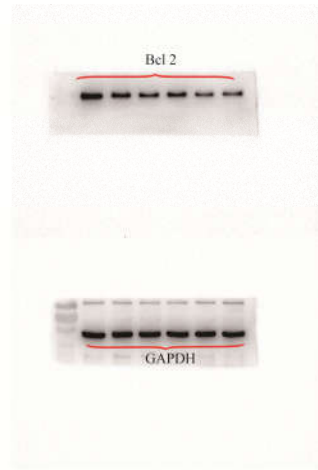

Fig 5.

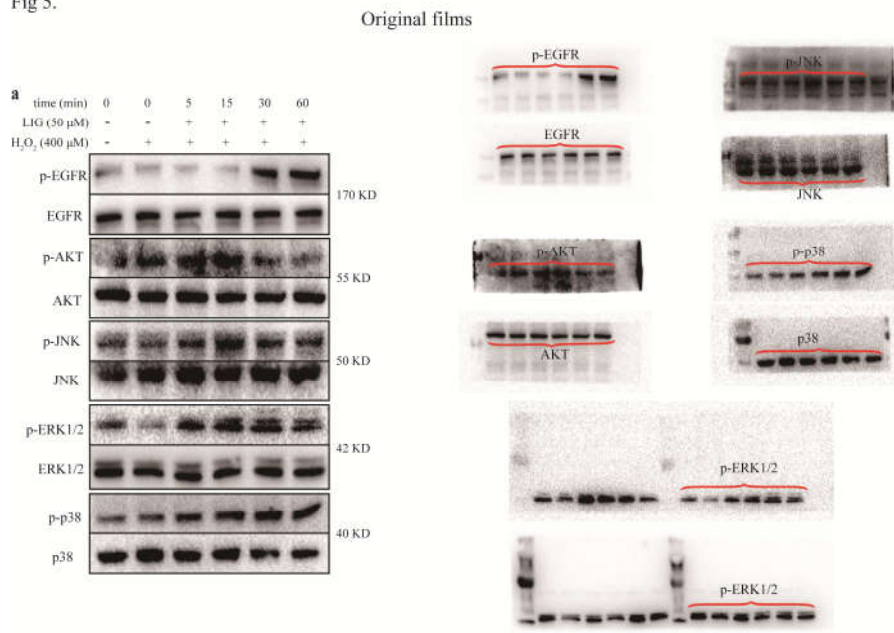

Fig 5.

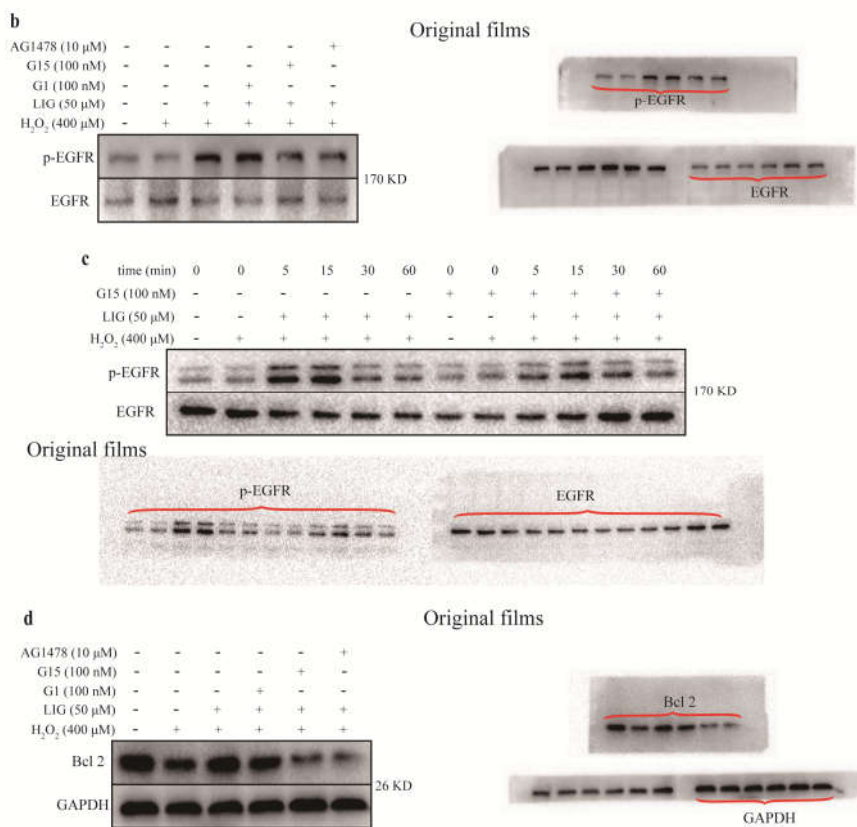

Supplement: 41598_2019_43518_MOESM1_ESM.pdf [file 41598_2019_43518_MOESM1_ESM.pdf]
